# Supplementary material
Source: PubMed Central journal article supplement (PMC3858987)
Supplement: 10-1055-s-0033-1350877-sup_gf691.pdf [file 10-1055-s-0033-1350877-sup_gf691.pdf]

# Stellenwert der Laparoskopie in der Therapie der Endometrium- und Zervixkarzinome – Ergebnisse der AGE & AGO Klinikumfrage 2012

## Use of Laparoscopy in the Treatment of Endometrial and Cervical Cancer – Results of a 2012 Germany-wide Survey

### Autoren

I. Juhasz-Böss<sup>1,4</sup>, P. Mallmann<sup>2,4</sup>, C. P. Möller<sup>3,5</sup>, E. F. Solomayer<sup>1,5</sup>

### Institute

Die Institutsangaben sind am Ende des Beitrags gelistet.

### Schlüsselwörter

- Endometriumkarzinom
- Zervixkarzinom
- operative Therapie
- Laparoskopie
- Endoskopie
- Epidemiologie
- Frauenheilkunde

### Key words

- endometrial cancer
- cervical cancer
- surgical therapy
- laparoscopy
- endoscopy
- epidemiology
- gynaecology

**eingereicht** 30.4.2013

**revidiert** 7.8.2013

**akzeptiert** 30.8.2013

### Bibliografie

**DOI** <http://dx.doi.org/10.1055/s-0033-1350877>  
 Geburtsh Frauenheilk 2013; 73:  
 1–7 © Georg Thieme Verlag KG  
 Stuttgart · New York ·  
 ISSN 0016-5751

### Korrespondenzadresse

**PD Dr. Ingolf Juhasz-Böss**  
 Universitätsklinikum  
 des Saarlandes  
 Klinik für Frauenheilkunde,  
 Geburtshilfe und  
 Reproduktionsmedizin  
 Kirrbergstraße 1  
 66424 Homburg/Saar  
 Ingolf.Juhasz-Boess@  
 uniklinikum-saarland.de

### Zusammenfassung

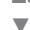

**Einleitung:** Die Endoskopie nimmt eine zunehmende Bedeutung in der operativen Therapie der Uteruskarzinome ein. Es gibt bis dato keine Daten, wie verbreitet der Einsatz der Laparoskopie (LSK) in der Therapie der Endometrium- (EC) und Zervixkarzinome (CC) ist.

**Method:** Deutschlandweite anonymisierte Klinikumfrage unter allen gynäkologisch/endoskopisch operierenden Kliniken mittels standardisiertem Fragebogen.

**Ergebnisse:** 128 Klinikantworten: 16 Unikliniken (12,5%), 30 Kliniken der Maximalversorgung (23,4%), 66 Kliniken der Regelversorgung (51,5%), 5 Tageskliniken (3,9%), 4 Belegärzte (3,1%) und 7 Kliniken (5,4%) ohne Statusangabe. Die LSK kommt in 82% aller EC- und in 54% aller CC zum Einsatz. EC werden in 58% der Fälle komplett laparoskopisch und in 32% der Fälle vaginal assistiert laparoskopisch operiert. Im Falle einer Lymphonodektomie (LNE) erfolgt diese in 42% der Fälle abdominal und in 53% laparoskopisch. Beim CC erfolgt in 44% eine laparoskopische radikale Hysterektomie (HE) und in 14% eine radikale HE in Kombination mit vaginalem Vorgehen. 4% der Kliniken geben an, weitere endoskopische Methoden (z.B. DaVinci) anzuwenden. Während die meisten Kliniken (43,3%) mehr als 75% der EC laparoskopisch behandeln, ist die Rate der endoskopisch operierten CC in den meisten Kliniken (38,3%) unter 25%.

**Diskussion:** EC werden häufiger als CC laparoskopisch operiert. Zwischen den Kliniken gibt es jedoch noch große Unterschiede bez. Fallzahl, der Anzahl der endoskopisch operierten Uteruskarzinome und der Art der endoskopischen OP.

### Abstract

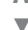

**Introduction:** Endoscopy has begun to play an increasingly important role in the surgical therapy of uterine cancers. To date, there is no data on the use of laparoscopy to treat endometrial cancer (EC) and cervical cancer (CC).

**Method:** A Germany-wide, anonymised survey was done of all gynaecological clinics/endoscopy clinics, using a standardised questionnaire.

**Results:** A total of 128 clinics responded: 16 university clinics (12.5%), 30 hospitals offering maximum care (23.4%), 66 general hospitals (51.5%), 5 outpatient clinics (3.9%), 4 physicians in private practice affiliated to hospitals (3.1%) and 7 hospitals (5.4%) which did not indicate status. Laparoscopy was used in the treatment of 82% of all EC and 54% of CC. Surgery for EC was done completely laparoscopically in 58% of cases and with laparoscopic assistance using a vaginal approach in 32% of cases. If lymphadenectomy (LNE) was additionally performed, this was done abdominally in 42% of cases and laparoscopically in 53%. Cervical cancer was treated by laparoscopic radical hysterectomy (HE) in 44% of cases and by radical HE using a vaginal approach in 14%. 4% of hospitals reported the use of other endoscopic methods (e.g. DaVinci). While the majority of hospitals (43.3%) treated more than 75% of EC patients using laparoscopy, in many clinics (38.3%) less than 25% of CC patients were treated using endoscopy.

**Discussion:** Laparoscopy is used more often in EC surgery as compared to surgery for CC. However, there are still major differences between hospitals with regard to case numbers, the number of uterine cancers treated using endoscopic surgery, and the type of endoscopic surgery.

## Einleitung

Das Endometriumkarzinom und das Zervixkarzinom zählen zu den häufigsten Genitalkarzinomen der Frau. In Deutschland gibt es jährlich gemäß RKI-Angaben aus 2012 etwa 11 200 Neuerkrankungen am Endometriumkarzinom sowie etwa 4600 Neuerkrankungen am Zervixkarzinom [1–4].

Die Therapieentscheidung wird für beide Karzinome unter Berücksichtigung des Allgemeinzustands der Patientin, des Tumorstadiums, der persönlichen Lebens- und Familienplanung der Patientin und der Risikofaktoren gefällt.

Dabei steht sowohl beim frühen Endometrium- als auch beim frühen Zervixkarzinom die operative Therapie in der Primärsituation im Vordergrund.

Die Laparoskopie (LSK) findet hierbei zunehmend ihren Stellenwert. So haben bereits einige Arbeitsgruppen ihre Erfahrungen mit der LSK in der onkochirurgischen Therapie des frühen Endometrium- und Zervixkarzinoms beschrieben. Es werden v. a. die beiden Methoden der laparoskopisch assistierten (radikalen) vaginalen Hysterektomie (LAVH) in Kombination mit einer laparoskopischen Lymphonodektomie (LNE) oder die komplette laparoskopische totale bzw. radikale Hysterektomie (TLH) mit beidseitiger Adnexektomie und laparoskopischer LNE beschrieben.

Die Vorteile der LSK im Vergleich zur Laparotomie in der gynäkologischen Onkochirurgie überwiegen. So werden von den meisten Autoren geringere perioperative Komplikationsraten, geringere Blutverluste, geringere Transfusionsraten und kürzere Hospitalisationszeiten sowie eine höhere Lebensqualität nach einer laparoskopischen Hysterektomie im Vergleich zur abdominalen Hysterektomie in der Therapie der Endometrium- und Zervixkarzinome berichtet [5–10].

Ein wesentlicher Aspekt bei der Etablierung neuer Verfahren in der Onkochirurgie ist die Gewährleistung der onkologischen Sicherheit. Betrachtet man die onkologische Sicherheit, so berichten bisherige Arbeitsgruppen über keine wesentlichen Unterschiede zwischen LSK und Laparotomie in der Therapie der Uteruskarzinome. So beträgt z. B. in der Therapie des Endometriumkarzinoms das rezidivfreie Überleben nach einer LSK 90–100% und nach einer Laparotomie 92–95% [6, 11–21]. Mehrere randomisierte Studien konnten weder im Gesamt- noch im rezidivfreien Überleben einen Unterschied zwischen laparoskopischer und abdominaler Hysterektomie zeigen [14, 20, 21]. Eine onkologisch adäquate LNE kann auch per LSK erfolgen. Die Anzahl der entfernten pelvinen und paraaortalen Lymphknoten ist unabhängig vom gewählten operativen Zugang, die LSK diesbezüglich der Laparotomie damit gleichwertig [22–25].

Bis dato ist jedoch immer noch die klassische Längsschnitt-Laparotomie das Standardverfahren in der Therapie der Uteruskarzinome. In den letzten Jahren wurde die Endoskopie jedoch zunehmend in der Therapie der Uteruskarzinome eingesetzt – analog zur stetig zunehmenden Rate an laparoskopischen Hysterektomien bei benignen uterinen Erkrankungen. Es gibt jedoch derzeit noch keine zuverlässigen Daten zur Häufigkeit der endoskopischen Verfahren in der Gynäkoonkologie. Eine flächendeckende statistische Datenerhebung gibt es nicht. Ziel unserer Arbeit war es, erstmals und unter Kooperation mehrerer Fachgesellschaften die flächendeckende Anzahl bzw. Rate an Kliniken zu erfassen, die eine endoskopische Therapie der Endometrium- und Zervixkarzinome anbieten. Zudem soll diese Arbeit erstmals eruieren, wie oft diese Verfahren auch tatsächlich durchgeführt werden.

## Methodik

Zur Erfassung des Stellenwerts der Laparoskopie in der Therapie der uterinen Karzinome erfolgte 2012 eine deutschlandweite Umfrage unter allen gynäkologischen endoskopisch operierenden Kliniken. In Kooperation zwischen der Arbeitsgemeinschaft Gynäkologische Endoskopie e. V. (AGE) der Deutschen Gesellschaft für Gynäkologie und Geburtshilfe e. V. (DGGG) und der Arbeitsgemeinschaft Gynäkologische Onkologie (AGO), Organkommission Uterus, wurde ein 2-seitiger Fragebogen erstellt. Dieser Erhebungsbogen wurde allen Mitgliedern der AGE sowie der AGO Kommission Uterus elektronisch via E-Mail übersandt. Die Mitglieder wurden gebeten, den Bogen bis September 2012 ausgefüllt zurückzusenden. Die Antworten sowie die Auswertung erfolgten anonymisiert.

Abgefragt wurden die folgenden Parameter: Angaben zur Klinik (Universitätsklinik, Klinik der Maximalversorgung, Klinik der Regelversorgung oder Belegabteilung) und Anzahl der jährlich in der Klinik behandelten primärer Endometrium- und Zervixkarzinome.

Zur Evaluierung der Laparoskopien in der Behandlung primärer Endometriumkarzinome in den jeweiligen Kliniken wurden die folgenden Parameter abgefragt: ob in der Klinik primäre Endometriumkarzinome laparoskopisch behandelt werden (ja/nein). Wenn ja, so konnten folgende Angaben angekreuzt werden: nur diagnostisch bzw. zwecks Staging (denn zur stadiengerechten OP erfolgt die Laparokonversion), bevorzugt als LAVH + AE, bevorzugt als TLH + AE oder sonstiges Vorgehen.

Zudem wurde die Rate laparoskopisch operierter Endometriumkarzinome am jeweiligen klinikeigenen Gesamtkollektiv abgefragt (< 25%, 25–50%, 50–75% oder > 75%).

Auch Angaben zur Lymphonodektomie wurden erfragt. Eine genauere Beschreibung der LNE (ob pelvin ± paraaortal) wurde nicht abgefragt. Sofern eine Lymphonodektomie indiziert ist, sollten die Kliniken angeben, ob diese abdominal oder laparoskopisch erfolgt oder ob die Patientin hierzu an eine andere Klinik überwiesen wird. Sofern die Patientin zur Weiterbehandlung in eine andere Klinik überwiesen wird, sollten Angaben zur Entscheidungsfindung der Klinikwahl gemacht werden (ob hierzu bewusst eine Klinik, welche die Komplettierungs-OP laparoskopisch oder abdominal durchführt, gewählt wird, oder ob dies für die Entscheidung egal ist).

Zur Evaluierung der Laparoskopien in der Behandlung primärer Zervixkarzinome wurden folgende Parameter abgefragt: ob in der Klinik primäre Zervixkarzinome laparoskopisch behandelt werden (ja/nein). Wenn ja, so konnten unter Mehrfachnennung folgende Angaben angekreuzt werden: diagnostisch bzw. zwecks Staging, als radikale Hysterektomie/„LSK-Wertheim“ mit komplettem laparoskopischem Vorgehen, als radikale Hysterektomie/„LSK-Wertheim“ mit assistiert vaginalem Vorgehen, als radikale vaginale Trachelektomie mit laparoskopischer LNE, als radikale laparoskopische Trachelektomie mit laparoskopischer LNE oder sonstiges Verfahren.

Zudem wurde die Rate laparoskopisch operierter Zervixkarzinome am jeweiligen klinikeigenen Gesamtkollektiv – analog zum Endometriumkarzinom – abgefragt (< 25%, 25–50%, 50–75% oder > 75%).

Des Weiteren sollten Angaben zur paraaortalen LNE gemacht werden. Sofern diese zwecks Staging durchgeführt wird, konnte angegeben werden, ob dies bevorzugt laparoskopisch retroperitoneal oder transperitoneal oder sonstwie erfolgt.

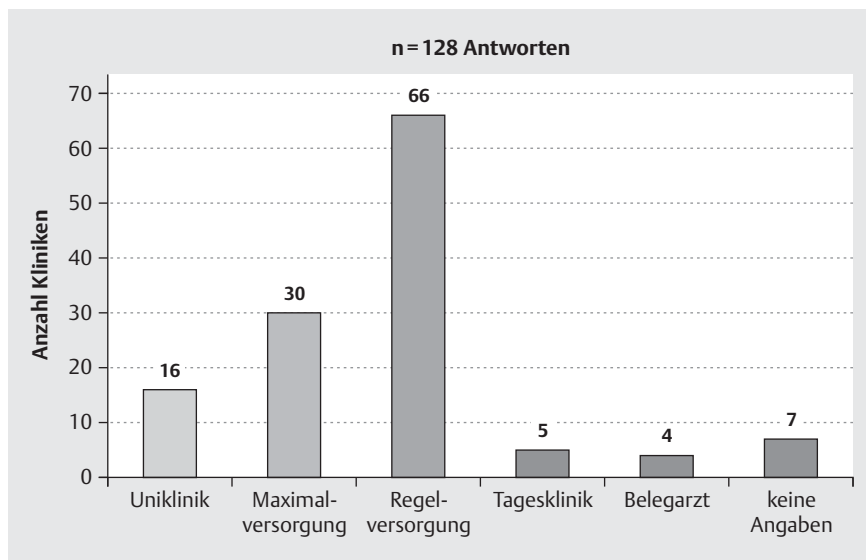

**Abb. 1** Angaben zur Klinikgröße bzw. -status aller an der Umfrage teilnehmender Kliniken (n = 128).

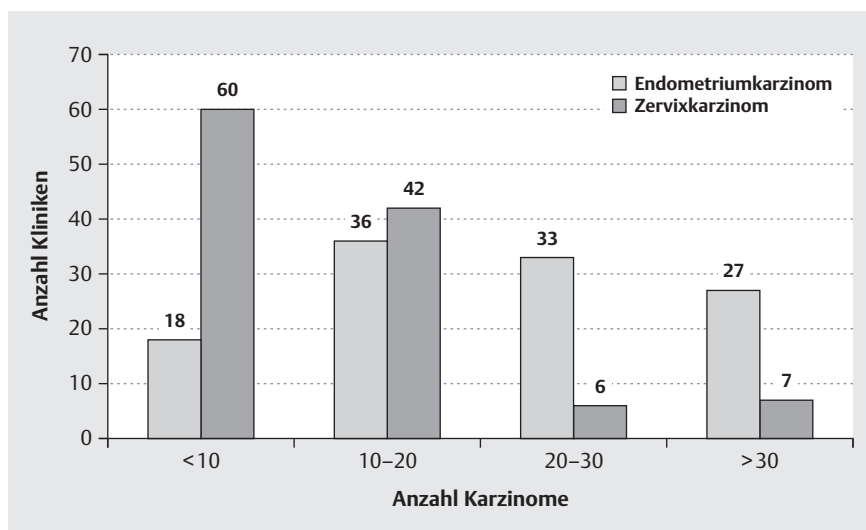

**Abb. 2** Anzahl der Kliniken mit Angaben zur Anzahl jährlich behandelter primärer Endometriumkarzinome bzw. Zervixkarzinome.

## Ergebnisse

Insgesamt haben n = 128 Kliniken an der Umfrage teilgenommen, wobei der Fragebogen an insgesamt 540 AGE-Mitglieder versandt wurde. Dies entspricht einer Rücklaufquote von 23,7%. Geantwortet haben im Einzelnen: n = 16 Universitätskliniken (12,5%), n = 30 Kliniken der Maximalversorgung (23,4%), n = 66 Kliniken der Regelversorgung (51,5%), n = 5 Tageskliniken (3,9%), n = 4 Belegärzte (3,1%) und n = 7 Kliniken ohne Angabe zur Klinikgröße bzw. -status (5,4%) (Abb. 1).

Angaben zur Anzahl primärer Endometriumkarzinomen, die pro Jahr in der jeweiligen Klinik operiert werden, waren wie folgt: n = 18 Kliniken (15,7%) behandeln weniger als 10 Endometriumkarzinome, n = 36 Kliniken (31,5%) 10 bis 20, n = 33 Kliniken (28,9%) 20 bis 30 und n = 27 Kliniken (23,7%) mehr als 30 primäre Endometriumkarzinome pro Jahr (Abb. 2). Bezüglich der Anzahl der primären Zervixkarzinome behandeln n = 60 Kliniken (52,1%) weniger als 10 Zervixkarzinome pro Jahr, n = 42 Kliniken (36,5%) 10 bis 20, n = 6 Kliniken (5,2%) 20 bis 30 und n = 7 Kliniken (6%) mehr als 30 primäre Zervixkarzinome pro Jahr (Abb. 2).

## Endometriumkarzinome

Laparoskopien in der operativen Behandlung des Endometriumkarzinoms werden in 82% der Kliniken (n = 105) durchgeführt (Abb. 3). Dabei erfolgt in 58% der Fälle eine Laparoskopie zur Durchführung einer totalen laparoskopischen Hysterektomie und Adnexektomie bds., in 32% der Fälle zur Durchführung einer vaginal assistierten laparoskopischen Hysterektomie (und Adnexektomie bds.), in 4% der Fälle zwecks Staging, und in 6% der Fälle werden weitere endoskopische Methoden, wie z.B. „Da-Vinci“, angewandt (Abb. 4).

Die Rate der endoskopisch operierten Endometriumkarzinompatientinnen der jeweiligen Klinik ist in Abb. 5 dargestellt. n = 28 Kliniken (26%) behandeln weniger als 25% ihrer Endometriumkarzinome laparoskopisch, n = 17 Kliniken (15,7%) behandeln 25–50%, weitere n = 17 Kliniken (15,7%) 50–75% und n = 46 Kliniken (43,3%) behandeln mehr als 75% ihrer Endometriumkarzinome laparoskopisch (Abb. 5).

Falls eine Lymphonodektomie notwendig ist, dann wird diese in 42% der Kliniken abdominal und in 53% der Kliniken laparoskopisch durchgeführt. In 5% der Kliniken wird hierfür an eine andere Klinik weiterüberwiesen. Sofern zur Lymphonodektomie

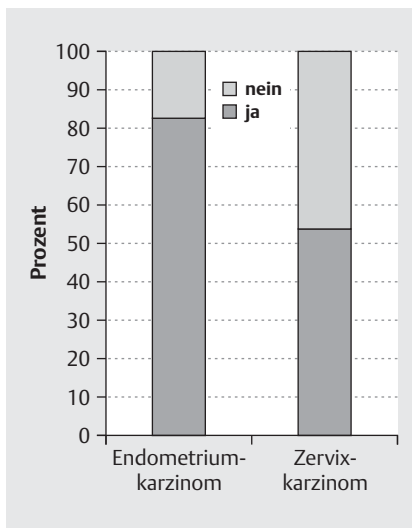

**Abb. 3** Anteil der Kliniken in %, welche die Laparoskopie in der primären Therapie der Endometrium- bzw. Zervixkarzinome einsetzen (n = 128 Klinikantworten zum Endometrium- und n = 127 Klinikantworten zum Zervixkarzinom).

an eine weitere Klinik überwiesen wird, dann erfolgt in 55% der Fälle (n = 28) die Überweisung an eine Klinik, in der die Komplettierungsoperation per Laparoskopie und in 6% der Fälle (n = 3) an eine Klinik, in der die Operation per abdominalem Vorgehen durchgeführt wird. In 39% der Fälle (n = 20) ist der weiterüberweisenden Klinik die Art der Weiterbehandlung egal.

### Zervixkarzinome

Laparoskopien im Rahmen der Behandlung primärer Zervixkarzinome werden in 53,1% der Kliniken (n = 68) durchgeführt (Abb. 3). Hiervon wird in 48,5% der Kliniken (n = 33) die Laparoskopie zu diagnostischen Zwecken, in 73,5% der Kliniken (n = 50) zur radikalen Hysterektomie mit komplettem endoskopischen Vorgehen, in 20,5% der Kliniken zur radikalen Hysterektomie in Kombination mit vaginalem Vorgehen, in 19,1% der Kliniken zur radikalen vaginalen Trachelektomie kombiniert mit laparoskopischer Lymphonodektomie, in einer Klinik (1,4%) zur radikalen laparoskopischen Trachelektomie mit laparoskopischer Lymphonodektomie, und in 7,3% der Kliniken (n = 5) werden weitere endoskopische Methoden (z.B. DaVinci, TMMR) angewandt (Mehrfachnennungen möglich) (Abb. 6).

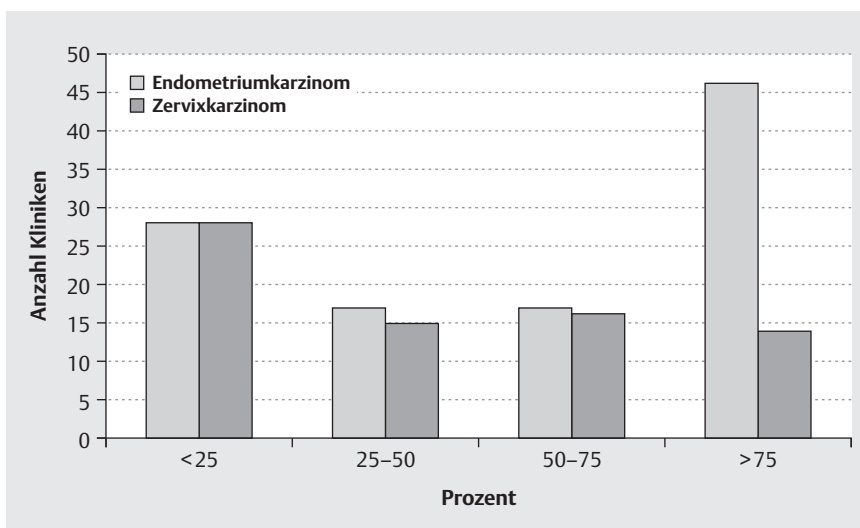

**Abb. 5** Anzahl der Kliniken mit Angabe zur Rate laparoskopisch operierter Endometrium- sowie Zervixkarzinome am klinkeigenen Gesamt Kollektiv. Angegeben werden konnte, ob weniger als 25%, 25-50%, 50-75% oder mehr als 75% der jeweiligen Karzinome in der eigenen Klinik per Laparoskopie behandelt werden. Daten wurden getrennt für das Endometrium- sowie das Zervixkarzinom abgefragt.

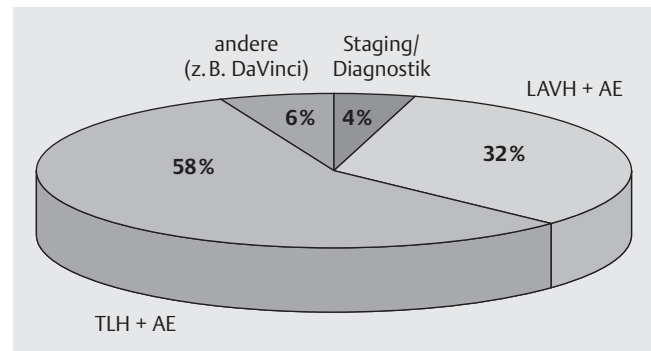

**Abb. 4** Einsatzrate der verschiedenen laparoskopischen Therapieoptionen in der Behandlung primärer Endometriumkarzinome (LAVH – laparoskopisch assistierte vaginale Hysterektomie; TLH – laparoskopisch totale Hysterektomie; AE – Adnexektomie).

Die Rate der laparoskopisch operierten Patientinnen am klinkeigenen Gesamt Kollektiv ist an n = 28 Kliniken (38,3%) unter 25%, an n = 15 Kliniken (20,5%) zwischen 25 und 50%, an n = 16 Kliniken (21,9%) zwischen 50 und 75% sowie an n = 14 Kliniken (19,1%) über 75% (Abb. 5).

Bei der laparoskopischen paraaortalen Lymphonodektomie wird in 79% der Kliniken (n = 50) ein transperitoneales, in 5% der Kliniken ein retroperitoneales (n = 3) und in 16% der Kliniken (n = 10) ein sonstiges Vorgehen bevorzugt.

### Diskussion

Die Endoskopie nimmt einen immer wichtigeren Platz in der Gynäkologie ein. Auch in der Gynäkoonkologie nimmt die Rate endoskopisch operierter Patientinnen zu. Bis heute ist allerdings unklar, wie weitverbreitet die Endoskopie in der Therapie der Uteruskarzinome zum Einsatz kommt. In dieser Umfrage wurde daher die Verbreitung endoskopischer OP-Verfahren beim Endometrium- und Zervixkarzinom deutschlandweit anonymisiert erfragt. Besonders hervorzuheben ist, dass dies erstmals und in

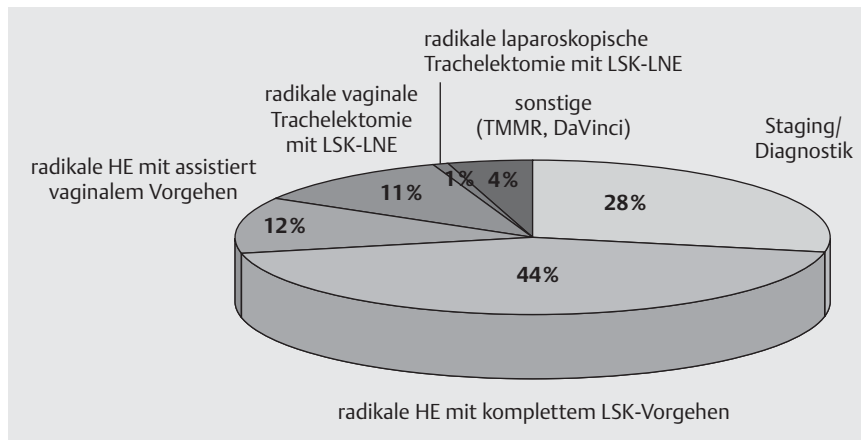

**Abb. 6** Laparoskopien in der Behandlung primärer Zervixkarzinome werden in Ihrer Klinik durchgeführt als (Mehrfachnennungen möglich) (HE – Hysterektomie, LSK – Laparoskopie, LNE – Lymphonodektomie, TMMR – totale mesometriale Resektion).

Kooperation der beiden Fachgesellschaften „Arbeitsgemeinschaft Gynäkologische Endoskopie e.V.“ (AGE) und der „Arbeitsgemeinschaft Gynäkologische Onkologie e.V.“ (AGO), Kommission Uterus, erfolgte.

Insgesamt haben 128 Kliniken geantwortet. Die genaue Anzahl der in Deutschland gynäkologisch operierender Kliniken ist unklar. Man kann von mehreren Hundert Kliniken ausgehen. Daher ist die Rücklaufquote von 128 Antwortbögen für eine freiwillige und unehonorierte Umfrage als gut zu betrachten, zumal auch erfahrungsgemäß Rücklaufquoten anderer vergleichbarer Umfragen in Deutschland nicht wesentlich höher sind (z. B. Zervixkarzinomfrage von Mangler et al.: 34% [26]). Unsere prozentuale Rücklaufquote von 23,7% ist wahrscheinlich auch etwas höher anzusehen, da nicht 560 Kliniken, sondern AGE-Mitglieder angeschrieben worden sind und pro Klinik nur ein Bogen (anonym) zurückgesandt werden sollte. Daher ist gemessen an Kliniken, in denen ja z. T. auch mehrere AGE-Mitglieder tätig sind, von einer prozentual höheren Rücklaufquote auszugehen.

Die Verteilung der Antworten zeigt, dass die Universitätskliniken (ca. 12,5% aller teilnehmenden Kliniken) etwas überrepräsentiert sind. Nahezu 50% der Universitätsfrauenkliniken haben an der Umfrage teilgenommen. Die meisten antwortenden Kliniken waren Kliniken der Regelversorgung (52%), gefolgt von Häusern der Maximalversorgung (23%). Erfreulicherweise haben auch Tageskliniken (4%) und Belegärzte (3%) an der Umfrage teilgenommen. Insgesamt ist von einer repräsentativen Verteilung der gynäkologisch operierenden Kliniken in unserem Kollektiv auszugehen.

Es ist hervorzuheben, dass derzeit so gut wie keine Daten über die Anwendung endoskopischer Verfahren in der Gynäkologie existieren. Es gibt keine zuverlässige Erhebung zu dieser Fragestellung. Diese Informationen können nur auf freiwilliger Basis erhoben werden, wodurch ein Bias nicht ausgeschlossen werden kann. Bessere Methoden, um Daten zu dieser Fragestellung zu beantworten, gibt es kaum. Man muss davon ausgehen, dass die Kliniken, die keine Laparoskopie in der Gynäkologie anwenden, den Fragebogen seltener beantwortet haben. Zudem haben auch sicherlich nicht alle Zentren oder Kliniken geantwortet, die gynäkologisch laparoskopieren. In unserem Kollektiv dürfte daher der Anteil der endoskopisch operierenden Kliniken höher sein als der wahrscheinlich deutschlandweit real vorhandene.

Die Anzahl der behandelten Zervixkarzinome ist deutlich geringer als die der Endometriumkarzinome. Während weniger als 10 primäre Endometriumkarzinome in 16% der Kliniken operativ behandelt werden, liegt diese Anzahl bei Zervixkarzinomen bei

52%. Mehr als 20 Primärfälle werden lediglich in 11% der Kliniken beim Zervixkarzinom, aber in 53% beim Endometriumkarzinom therapiert. Diese Zahlen werden auch von Mangler et al. bestätigt. Gemäß deren 2013 publizierten Umfrageergebnissen werden lediglich in 9% aller Frauenkliniken in Deutschland mehr als 25 Zervixkarzinome pro Jahr behandelt [26]. Das führt dazu, dass die Expertise beim Zervixkarzinom deutlich geringer ist als beim Endometriumkarzinom. Das ist ein erwartetes Ergebnis und repräsentiert die Verteilung der primären Zervixkarzinome im Vergleich zu den Endometriumkarzinomen.

Die Laparoskopierate in der Behandlung der Zervixkarzinome liegt gemäß unserer Umfrage bei 53%. Dabei wurden nebst therapeutischen Eingriffen auch die diagnostischen bzw. Staging-LSKs mitberücksichtigt, wobei 28% der Kliniken angaben, „nur“ diagnostisch bzw. zwecks Staging zu laparoskopieren. Damit ist also die „bereinigte“ Rate der Kliniken, die explizit endoskopisch radikal hysterektomieren (unabhängig von der Methode, ob LARVH, TLRH, „robotics“ usw.), niedriger. Mangler et al. zeigten anhand ihrer Umfrageergebnisse, dass 71% aller Frauenkliniken in Deutschland das Zervixkarzinom per abdominaler radikaler Hysterektomie operieren. Diese Diskrepanz weist erneut wie oben bereits erwähnt darauf hin, dass in unserem Kollektiv der Anteil der endoskopisch operierenden Kliniken vermutlich höher ist als der wahrscheinlich deutschlandweit real vorhandene.

Erfreulicherweise wird zur Behandlung des Endometriumkarzinoms häufig endoskopiert (82%). In diesen Fällen erfolgt die Operation aber nur in 58% komplett endoskopisch. In weiteren 32% wird zwar vaginal operiert, aber unter endoskopischer Kontrolle. Dieses Ergebnis zeigt das unterschiedliche Verfahren bei ein und derselben OP-Indikation. Der Einsatz der Endoskopie beim Endometriumkarzinom ist erwünscht, da nur so ein adäquates intraoperatives Staging (Peritonealkarzinose, Tumorausssaat, Beurteilung der Lymphknoten, etc.) unter Vermeidung der Morbidität einer Längsschnittlaparotomie möglich ist. Auch wenn die Lymphonodektomie in vielen Fällen stadienbedingt nicht notwendig ist, bleibt die Endoskopie ein wichtiger Schritt in der onkologischen Therapie. Eine Laparotomie ist in der Regel nicht erforderlich, bei fortgeschrittenen Stadien jedoch obligat [27]. Zahlreiche Daten demonstrieren, dass die Laparoskopie der Laparotomie überlegen oder zumindest ebenwertig ist [17, 20, 28–34].

Kritisch sei an dieser Stelle jedoch erwähnt, dass die Daten für die kurz- und mittelfristige endoskopische onkologische Sicherheit sowohl beim Zervix- als auch beim Endometriumkarzinom vorhanden sind, diese aber für die langfristige onkologische Sicherheit noch fehlen. Somit müssen die endoskopischen Verfahren

diesbez. immer noch kritisch diskutiert bzw. die Patienten darauf hingewiesen werden. Auch sei an dieser Stelle nochmals erwähnt, dass nebst Vorteilen für die LSK dieses Verfahren auch Nachteile mit sich bringt: verlängerte OP-Zeiten und ein höherer technischer Aufwand. Bezüglich Kosten-Nutzen-Analysen zum Thema LSK in der Therapie der Uteruskarzinome fehlen leider adäquate Zahlen aus Deutschland. Insgesamt ist die Laparoskopie jedoch in der Kosten-Nutzen-Evaluation ein teureres Verfahren. Auch erfordert sie technisch wie bereits erwähnt mehr Expertise als das offene Vorgehen. Daher wird wahrscheinlich trotz zunehmendem Einsatz der LSK in der Onkochirurgie die LSK doch Kliniken mit höherer operativer Expertise vorbehalten bleiben. In der Zukunft wird die Laparoskopie dennoch immer mehr an Bedeutung gewinnen. Ihr Einsatz wird in immer mehr Kliniken wahrscheinlich und auch von einer stetig steigenden Rate an gynäkologischen OPs von der Laparotomie weg zur LSK ist auszugehen. Diese Daten helfen daher, einen aktuellen Überblick über den Stellenwert der LSK in der operativen Therapie der Endometrium- und Zervixkarzinome zu erhalten. Man muss jedoch darauf hinweisen, dass die Umfrage bei den Kliniken erfolgte, die sich in besonderer Weise entweder mit der Endoskopie und/oder den Uteruskarzinomen beschäftigen und die Ergebnisse damit nur bedingt repräsentativ für die Versorgungslage in Deutschland ist. Dennoch sind dies bis dato die aussagekräftigsten Daten zum Thema Stellenwert der LSK in der Therapie der Uteruskarzinome.

### Interessenkonflikt

▼  
Nein.

### Institute

- <sup>1</sup> Klinik für Frauenheilkunde, Geburtshilfe und Reproduktionsmedizin, Universitätsklinikum des Saarlandes, Homburg/Saar
- <sup>2</sup> Frauenklinik, Uniklinik Köln, Köln
- <sup>3</sup> Tagesklinik Altonaer Straße, Hamburg
- <sup>4</sup> Kommission Uterus der AGO – Arbeitsgemeinschaft Gynäkologische Onkologie e. V.
- <sup>5</sup> AGE – Arbeitsgemeinschaft Gynäkologische Endoskopie e. V. der Deutschen Gesellschaft für Gynäkologie und Geburtshilfe e. V. (DGGG)

### Literatur

- 1 AGO; DKG; DGGG. Diagnostik und Therapie des Endometriumkarzinoms. Interdisziplinäre S2-Leitlinie, AWMF 032/034. www.awmf.de
- 2 AGO; DKG; DGGG. Diagnostik und Therapie des Zervixkarzinoms. Interdisziplinäre S2 k-Leitlinie, AWMF 032/033. www.awmf.de
- 3 Robert Koch-Institut; die Gesellschaft der epidemiologischen Krebsregister in Deutschland e. V., Hrsg. Krebs in Deutschland 2007/2008. 8. Ausgabe. Berlin: 2012
- 4 Waldmann A, Eisemann N, Katalinic A. Epidemiology of malignant cervical, corpus uteri and ovarian tumours – current data and epidemiological trends. *Geburtsh Frauenheilk* 2013; 73: 123–129
- 5 Eltabbakh GH. Analysis of survival after laparoscopy in women with endometrial carcinoma. *Cancer* 2002; 95: 1894–1901
- 6 Magrina JF, Mutone NF, Weaver AL et al. Laparoscopic lymphadenectomy and vaginal or laparoscopic hysterectomy with bilateral salpingo-oophorectomy for endometrial cancer: morbidity and survival. *Am J Obstet Gynecol* 1999; 181: 376–381
- 7 Magrina JF, Weaver AL. Laparoscopic treatment of endometrial cancer: five-year recurrence and survival rates. *Eur J Gynaecol Oncol* 2004; 25: 439–441
- 8 Zullo F, Palomba S, Russo T et al. A prospective randomized comparison between laparoscopic and laparotomic approaches in women with early stage endometrial cancer: a focus on the quality of life. *Am J Obstet Gynecol* 2005; 193: 1344–1352
- 9 Spirtos NM, Schlaerth JB, Gross GM et al. Cost and quality-of-life analyses of surgery for early endometrial cancer: laparotomy versus lapa-

- roscopy. *Am J Obstet Gynecol* 1996; 174: 1795–1799; discussion 1799–1800
- 10 Solomayer EF, Becker S. Neue Entwicklungen der Zervixkarzinom-Chirurgie – der laparoskopische Wertheim. *Geburtsh Frauenheilk* 2007; 12: 1375–1377
- 11 Hildebaugh DA, Orr RK. Staging endometrioid adenocarcinoma. Clinical and financial comparison of laparoscopic and traditional approaches. *J Reprod Med* 1997; 42: 482–488
- 12 Gemignani ML, Curtin JP, Zelmanovich J et al. Laparoscopic-assisted vaginal hysterectomy for endometrial cancer: clinical outcomes and hospital charges. *Gynecol Oncol* 1999; 73: 5–11
- 13 Scribner jr. DR, Walker JL, Johnson GA et al. Surgical management of early-stage endometrial cancer in the elderly: is laparoscopy feasible? *Gynecol Oncol* 2001; 83: 563–568
- 14 Malur S, Possover M, Michels W et al. Laparoscopic-assisted vaginal versus abdominal surgery in patients with endometrial cancer – a prospective randomized trial. *Gynecol Oncol* 2001; 80: 239–244
- 15 Holub Z, Jabor A, Bartos P et al. Laparoscopic surgery for endometrial cancer: long-term results of a multicentric study. *Eur J Gynaecol Oncol* 2002; 23: 305–310
- 16 Manolitsas TP, McCartney AJ. Total laparoscopic hysterectomy in the management of endometrial carcinoma. *J Am Assoc Gynecol Laparosc* 2002; 9: 54–62
- 17 Fram KM. Laparoscopically assisted vaginal hysterectomy versus abdominal hysterectomy in stage I endometrial cancer. *Int J Gynecol Cancer* 2002; 12: 57–61
- 18 Eltabbakh GH, Shamonki MI, Moody JM et al. Laparoscopy as the primary modality for the treatment of women with endometrial carcinoma. *Cancer* 2001; 91: 378–387
- 19 Obermair A, Manolitsas TP, Leung Y et al. Total laparoscopic hysterectomy for endometrial cancer: patterns of recurrence and survival. *Gynecol Oncol* 2004; 92: 789–793
- 20 Tozzi R, Malur S, Koehler C et al. Laparoscopy versus laparotomy in endometrial cancer: first analysis of survival of a randomized prospective study. *J Minim Invasive Gynecol* 2005; 12: 130–136
- 21 Juhasz-Böss I, Haggag H, Baum S et al. Laparoscopic and laparotomic approaches for endometrial cancer treatment: a comprehensive review. *Arch Gynecol Obstet* 2012; 286: 167–172
- 22 Zullo F, Falbo A, Palomba S. Safety of laparoscopy vs laparotomy in the surgical staging of endometrial cancer: a systematic review and meta-analysis of randomized controlled trials. *Am J Obstet Gynecol* 2012; 207: 94–100
- 23 Ju W, Myung SK, Kim Y et al. Comparison of laparoscopy and laparotomy for management of endometrial carcinoma: a meta-analysis. *Int J Gynecol Cancer* 2009; 19: 400–406
- 24 Palomba S, Falbo A, Russo T et al. Updating of a recent meta-analysis of randomized controlled trials to assess the safety and the efficacy of the laparoscopic surgery for treating early stage endometrial cancer. *Gynecol Oncol* 2009; 114: 135–136
- 25 Juhasz-Boess I. Oncological safety of laparoscopy in endometrium carcinoma. *Onkologie* 2012; 18: 714–717
- 26 Mangler M, Zech N, Schneider A et al. Aspects of therapy for cervical cancer in Germany 2012 – results from a survey of german gynaecological hospitals. *Geburtsh Frauenheilk* 2013; 73: 1–12
- 27 Juhasz-Böss I, Fehm T, Becker S et al. Endometrial cancer: comparison of patients with synchronous primary carcinoma of the endometrium and ovary vs. endometrial carcinoma with ovarian metastases. *Geburtsh Frauenheilk* 2012; 72: 721–726
- 28 Walker JL, Piedmonte MR, Spirtos NM et al. Recurrence and survival after random assignment to laparoscopy versus laparotomy for comprehensive surgical staging of uterine cancer: Gynecologic Oncology Group LAP2 Study. *J Clin Oncol* 2012; 30: 695–700
- 29 Walker JL, Piedmonte MR, Spirtos NM et al. Laparoscopy compared with laparotomy for comprehensive surgical staging of uterine cancer: Gynecologic Oncology Group Study LAP2. *J Clin Oncol* 2009; 27: 5331–5336
- 30 Zorlu CG, Simsek T, Ari ES. Laparoscopy or laparotomy for the management of endometrial cancer. *JSLs* 2005; 9: 442–446
- 31 Malzoni M, Tinelli R, Cosentino F et al. Total laparoscopic hysterectomy versus abdominal hysterectomy with lymphadenectomy for early-stage endometrial cancer: a prospective randomized study. *Gynecol Oncol* 2009; 112: 126–133
- 32 Zullo F, Palomba S, Falbo A et al. Laparoscopic surgery vs laparotomy for early stage endometrial cancer: long-term data of a randomized controlled trial. *Am J Obstet Gynecol* 2009; 200: 296.e1–296.e9

- 33 Janda M, Gebski V, Brand A et al. Quality of life after total laparoscopic hysterectomy versus total abdominal hysterectomy for stage I endometrial cancer (LACE): a randomised trial. *Lancet Oncol* 2010; 11: 772–780
- 34 Mourits MJ, Bijen CB, Arts HJ et al. Safety of laparoscopy versus laparotomy in early-stage endometrial cancer: a randomised trial. *Lancet Oncol* 2010; 11: 763–771
